# Supplementary material for: Effect of the allylic substituents on ring closing metathesis: the total synthesis of stagonolide B and 4-epi-stagonolide B
Source: Royal Society of Chemistry journal article supplement (doi:10.1039/b916198h), 2009-10-29

## Electronic Supplementary Information

### Effect of the allylic substituents on ring closing metathesis: The total synthesis of stagonolide B and 4-*epi*-stagonolide B

Awadut G. Giri, Mohabul A. Mondal, Vedavati G. Puranik and C. V. Ramana

**Crystal Data for 2:** Single crystals of the compound **2** were grown by slow evaporation a methanol solution of **2**. Colourless crystal of approximate size 0.14 x 0.05 x 0.02 mm, was used for data collection on *Bruker SMART APEX* CCD diffractometer using Mo-K $\alpha$  radiation with fine focus tube with 50kV and 30mA. All the data were corrected for Lorentzian, polarisation and absorption effects. SHELX-97 (ShelxTL) was used for structure solution and full matrix least squares refinement on F<sup>2</sup>. Hydrogen atoms were included in the refinement as per the riding model.

**Table 1.** Crystal data and structure refinement for 4-*epi*-stagonolide B.

|                                   |                                                                                                                         |
|-----------------------------------|-------------------------------------------------------------------------------------------------------------------------|
| Empirical formula                 | C <sub>12</sub> H <sub>20</sub> O <sub>5</sub>                                                                          |
| Formula weight                    | 244.28                                                                                                                  |
| Temperature                       | 295(2) K                                                                                                                |
| Wavelength                        | 0.71073 Å                                                                                                               |
| Crystal system, space group       | Monoclinic, C2                                                                                                          |
| Unit cell dimensions              | a = 16.861(15) Å    alpha = 90 deg.<br>b = 4.981(4) Å    beta = 112.087(14) deg.<br>c = 16.109(14) Å    gamma = 90 deg. |
| Volume                            | 1253.7(19) Å <sup>3</sup>                                                                                               |
| Z, Calculated density             | 4, 1.294 Mg/m <sup>3</sup>                                                                                              |
| Absorption coefficient            | 0.100 mm <sup>-1</sup>                                                                                                  |
| F(000)                            | 528                                                                                                                     |
| Crystal size                      | 0.14 x 0.05 x 0.02 mm                                                                                                   |
| Theta range for data collection   | 1.36 to 25.00 deg.                                                                                                      |
| Limiting indices                  | -20 ≤ h ≤ 19, -5 ≤ k ≤ 5, -15 ≤ l ≤ 19                                                                                  |
| Reflections collected / unique    | 5114 / 2177 [R(int) = 0.1106]                                                                                           |
| Completeness to theta             | = 25.00    99.7 %                                                                                                       |
| Absorption correction             | Semi-empirical from equivalents                                                                                         |
| Max. and min. transmission        | 0.9979 and 0.9864                                                                                                       |
| Refinement method                 | Full-matrix least-squares on F <sup>2</sup>                                                                             |
| Data / restraints / parameters    | 2177 / 1 / 158                                                                                                          |
| Goodness-of-fit on F <sup>2</sup> | 0.835                                                                                                                   |
| Final R indices [I > 2σ(I)]       | R1 = 0.0720, wR2 = 0.1554                                                                                               |
| R indices (all data)              | R1 = 0.1490, wR2 = 0.1731                                                                                               |
| Absolute structure parameter      | 5(3)                                                                                                                    |
| Largest diff. peak and hole       | 0.277 and -0.275 e.Å <sup>-3</sup>                                                                                      |

**Table 2.** Atomic coordinates ( $\times 10^4$ ) and equivalent isotropic displacement parameters ( $\text{\AA}^2 \times 10^3$ ) for 4-*epi*-stagonolide B.  $U(\text{eq})$  is defined as one third of the trace of the orthogonalized  $U_{ij}$  tensor.

|       | x       | y        | z       | $U(\text{eq})$ |
|-------|---------|----------|---------|----------------|
| O(1)  | 2588(2) | 6950(8)  | 2109(3) | 38(1)          |
| O(2)  | 2028(3) | 11014(9) | 2140(4) | 60(2)          |
| O(3)  | 698(3)  | 7078(8)  | 4019(3) | 44(1)          |
| O(4)  | 3724(3) | 10129(8) | 4195(3) | 40(1)          |
| O(5)  | 4829(2) | 7019(8)  | 3612(3) | 42(1)          |
| C(1)  | 1940(4) | 8615(16) | 2048(4) | 40(2)          |
| C(2)  | 1124(3) | 7182(13) | 1852(4) | 39(2)          |
| C(3)  | 715(4)  | 7809(12) | 2533(4) | 42(2)          |
| C(4)  | 1188(4) | 6654(13) | 3467(4) | 38(2)          |
| C(5)  | 2070(4) | 7689(12) | 3863(4) | 38(2)          |
| C(6)  | 2751(4) | 6297(11) | 3892(4) | 36(2)          |
| C(7)  | 3634(4) | 7232(12) | 4079(4) | 39(2)          |
| C(8)  | 3928(3) | 6572(12) | 3335(4) | 34(2)          |
| C(9)  | 3460(4) | 7943(12) | 2434(4) | 37(2)          |
| C(10) | 3813(4) | 7322(14) | 1735(4) | 45(2)          |
| C(11) | 3381(5) | 8698(16) | 844(4)  | 63(2)          |
| C(12) | 3790(5) | 8050(20) | 172(5)  | 95(3)          |

**Table 3.** Bond lengths [ $\text{\AA}$ ] and angles [deg] for 4-*epi*-stagonolide B.

|            |          |
|------------|----------|
| O(1)-C(1)  | 1.346(8) |
| O(1)-C(9)  | 1.450(7) |
| O(2)-C(1)  | 1.207(8) |
| O(3)-C(4)  | 1.439(6) |
| O(3)-H(3') | 0.8200   |
| O(4)-C(7)  | 1.456(7) |
| O(4)-H(4') | 0.8200   |
| O(5)-C(8)  | 1.431(6) |
| O(5)-H(5') | 0.8200   |
| C(1)-C(2)  | 1.476(9) |
| C(2)-C(3)  | 1.531(7) |
| C(2)-H(2A) | 0.9700   |
| C(2)-H(2B) | 0.9700   |
| C(3)-C(4)  | 1.526(8) |
| C(3)-H(3A) | 0.9700   |

|                  |           |
|------------------|-----------|
| C(3)-H(3B)       | 0.9700    |
| C(4)-C(5)        | 1.473(7)  |
| C(4)-H(4)        | 0.9800    |
| C(5)-C(6)        | 1.328(7)  |
| C(5)-H(5)        | 0.9300    |
| C(6)-C(7)        | 1.478(8)  |
| C(6)-H(6)        | 0.9300    |
| C(7)-C(8)        | 1.496(8)  |
| C(7)-H(7)        | 0.9800    |
| C(8)-C(9)        | 1.527(8)  |
| C(8)-H(8)        | 0.9800    |
| C(9)-C(10)       | 1.490(8)  |
| C(9)-H(9)        | 0.9800    |
| C(10)-C(11)      | 1.508(9)  |
| C(10)-H(10A)     | 0.9700    |
| C(10)-H(10B)     | 0.9700    |
| C(11)-C(12)      | 1.521(10) |
| C(11)-H(11A)     | 0.9700    |
| C(11)-H(11B)     | 0.9700    |
| C(12)-H(12A)     | 0.9600    |
| C(12)-H(12B)     | 0.9600    |
| C(12)-H(12C)     | 0.9600    |
|                  |           |
| C(1)-O(1)-C(9)   | 120.1(5)  |
| C(4)-O(3)-H(3')  | 109.5     |
| C(7)-O(4)-H(4')  | 109.5     |
| C(8)-O(5)-H(5')  | 109.5     |
| O(2)-C(1)-O(1)   | 122.8(6)  |
| O(2)-C(1)-C(2)   | 124.6(7)  |
| O(1)-C(1)-C(2)   | 112.6(6)  |
| C(1)-C(2)-C(3)   | 112.6(5)  |
| C(1)-C(2)-H(2A)  | 109.1     |
| C(3)-C(2)-H(2A)  | 109.1     |
| C(1)-C(2)-H(2B)  | 109.1     |
| C(3)-C(2)-H(2B)  | 109.1     |
| H(2A)-C(2)-H(2B) | 107.8     |
| C(4)-C(3)-C(2)   | 114.8(5)  |
| C(4)-C(3)-H(3A)  | 108.6     |
| C(2)-C(3)-H(3A)  | 108.6     |
| C(4)-C(3)-H(3B)  | 108.6     |
| C(2)-C(3)-H(3B)  | 108.6     |
| H(3A)-C(3)-H(3B) | 107.5     |
| O(3)-C(4)-C(5)   | 113.6(5)  |
| O(3)-C(4)-C(3)   | 110.2(5)  |
| C(5)-C(4)-C(3)   | 111.4(5)  |

|                     |          |
|---------------------|----------|
| O(3)-C(4)-H(4)      | 107.1    |
| C(5)-C(4)-H(4)      | 107.1    |
| C(3)-C(4)-H(4)      | 107.1    |
| C(6)-C(5)-C(4)      | 123.4(5) |
| C(6)-C(5)-H(5)      | 118.3    |
| C(4)-C(5)-H(5)      | 118.3    |
| C(5)-C(6)-C(7)      | 129.3(5) |
| C(5)-C(6)-H(6)      | 115.3    |
| C(7)-C(6)-H(6)      | 115.3    |
| O(4)-C(7)-C(6)      | 112.8(5) |
| O(4)-C(7)-C(8)      | 105.6(5) |
| C(6)-C(7)-C(8)      | 112.2(5) |
| O(4)-C(7)-H(7)      | 108.7    |
| C(6)-C(7)-H(7)      | 108.7    |
| C(8)-C(7)-H(7)      | 108.7    |
| O(5)-C(8)-C(7)      | 110.4(5) |
| O(5)-C(8)-C(9)      | 109.6(5) |
| C(7)-C(8)-C(9)      | 117.1(5) |
| O(5)-C(8)-H(8)      | 106.4    |
| C(7)-C(8)-H(8)      | 106.4    |
| C(9)-C(8)-H(8)      | 106.4    |
| O(1)-C(9)-C(10)     | 107.1(5) |
| O(1)-C(9)-C(8)      | 106.4(5) |
| C(10)-C(9)-C(8)     | 114.5(5) |
| O(1)-C(9)-H(9)      | 109.5    |
| C(10)-C(9)-H(9)     | 109.5    |
| C(8)-C(9)-H(9)      | 109.5    |
| C(9)-C(10)-C(11)    | 116.0(5) |
| C(9)-C(10)-H(10A)   | 108.3    |
| C(11)-C(10)-H(10A)  | 108.3    |
| C(9)-C(10)-H(10B)   | 108.3    |
| C(11)-C(10)-H(10B)  | 108.3    |
| H(10A)-C(10)-H(10B) | 107.4    |
| C(10)-C(11)-C(12)   | 113.3(6) |
| C(10)-C(11)-H(11A)  | 108.9    |
| C(12)-C(11)-H(11A)  | 108.9    |
| C(10)-C(11)-H(11B)  | 108.9    |
| C(12)-C(11)-H(11B)  | 108.9    |
| H(11A)-C(11)-H(11B) | 107.7    |
| C(11)-C(12)-H(12A)  | 109.5    |
| C(11)-C(12)-H(12B)  | 109.5    |
| H(12A)-C(12)-H(12B) | 109.5    |
| C(11)-C(12)-H(12C)  | 109.5    |
| H(12A)-C(12)-H(12C) | 109.5    |
| H(12B)-C(12)-H(12C) | 109.5    |

Table 4. Anisotropic displacement parameters ( $\text{Å}^2 \times 10^3$ ) for 4-*epi*-stagonolide B..  
 The anisotropic displacement factor exponent takes the form:  
 $-2 \pi^2 [ h^2 a^{*2} U11 + \dots + 2 h k a^* b^* U12 ]$

|       | U11    | U22     | U33    | U23    | U13   | U12   |
|-------|--------|---------|--------|--------|-------|-------|
| O(1)  | 36(2)  | 27(2)   | 48(2)  | 1(2)   | 11(2) | 8(2)  |
| O(2)  | 67(3)  | 17(3)   | 102(4) | 6(3)   | 41(3) | 9(2)  |
| O(3)  | 49(3)  | 32(3)   | 62(3)  | 8(3)   | 32(2) | 5(3)  |
| O(4)  | 53(3)  | 26(2)   | 36(3)  | 0(2)   | 11(2) | -6(2) |
| O(5)  | 33(2)  | 29(2)   | 62(3)  | -6(3)  | 17(2) | -1(2) |
| C(1)  | 39(4)  | 50(5)   | 28(4)  | 10(4)  | 7(3)  | 0(4)  |
| C(2)  | 42(4)  | 30(4)   | 43(4)  | -13(4) | 13(3) | 6(4)  |
| C(3)  | 40(4)  | 28(4)   | 50(4)  | 1(3)   | 8(3)  | 0(3)  |
| C(4)  | 50(4)  | 27(4)   | 42(4)  | -4(3)  | 24(3) | 4(3)  |
| C(5)  | 40(4)  | 30(4)   | 39(4)  | -4(3)  | 11(3) | -1(3) |
| C(6)  | 42(4)  | 15(3)   | 47(4)  | 5(3)   | 14(3) | 4(3)  |
| C(7)  | 37(4)  | 29(4)   | 49(4)  | 8(4)   | 15(3) | 5(3)  |
| C(8)  | 36(4)  | 20(3)   | 47(4)  | 3(3)   | 17(3) | 4(3)  |
| C(9)  | 33(4)  | 28(4)   | 42(4)  | -4(3)  | 5(3)  | 2(3)  |
| C(10) | 42(4)  | 47(5)   | 49(4)  | 4(4)   | 19(3) | 7(4)  |
| C(11) | 82(6)  | 61(5)   | 45(4)  | 7(4)   | 23(4) | -4(4) |
| C(12) | 100(7) | 142(10) | 57(5)  | 13(6)  | 47(5) | -6(6) |

Table 5. Hydrogen coordinates ( $\times 10^4$ ) and isotropic displacement parameters ( $\text{Å}^2 \times 10^3$ ) for 4-*epi*-stagonolide B..

|       | x    | y     | z    | U(eq) |
|-------|------|-------|------|-------|
| H(3') | 616  | 8690  | 4052 | 66    |
| H(4') | 3913 | 10492 | 4730 | 60    |
| H(5') | 4937 | 8599  | 3752 | 62    |
| H(2A) | 1224 | 5265  | 1852 | 47    |
| H(2B) | 728  | 7678  | 1259 | 47    |
| H(3A) | 681  | 9743  | 2583 | 50    |

|        |      |       |      |     |
|--------|------|-------|------|-----|
| H(3B)  | 134  | 7117  | 2306 | 50  |
| H(4)   | 1228 | 4709  | 3399 | 45  |
| H(5)   | 2154 | 9408  | 4107 | 45  |
| H(6)   | 2660 | 4470  | 3777 | 43  |
| H(7)   | 4019 | 6363  | 4629 | 46  |
| H(8)   | 3839 | 4639  | 3228 | 40  |
| H(9)   | 3460 | 9890  | 2521 | 44  |
| H(10A) | 3778 | 5398  | 1636 | 54  |
| H(10B) | 4414 | 7808  | 1967 | 54  |
| H(11A) | 3400 | 10624 | 939  | 75  |
| H(11B) | 2784 | 8163  | 595  | 75  |
| H(12A) | 4402 | 8082  | 468  | 142 |
| H(12B) | 3616 | 9361  | -299 | 142 |
| H(12C) | 3611 | 6299  | -76  | 142 |

---

Table 6. Torsion angles [deg] for 4-*epi*-stagonolide B..

---

|                        |           |
|------------------------|-----------|
| C(9)-O(1)-C(1)-O(2)    | 10.0(9)   |
| C(9)-O(1)-C(1)-C(2)    | -170.3(5) |
| O(2)-C(1)-C(2)-C(3)    | -54.6(9)  |
| O(1)-C(1)-C(2)-C(3)    | 125.7(6)  |
| C(1)-C(2)-C(3)-C(4)    | -69.8(8)  |
| C(2)-C(3)-C(4)-O(3)    | -173.0(5) |
| C(2)-C(3)-C(4)-C(5)    | 59.9(7)   |
| O(3)-C(4)-C(5)-C(6)    | 133.4(6)  |
| C(3)-C(4)-C(5)-C(6)    | -101.5(7) |
| C(4)-C(5)-C(6)-C(7)    | 165.2(6)  |
| C(5)-C(6)-C(7)-O(4)    | -3.9(9)   |
| C(5)-C(6)-C(7)-C(8)    | -123.0(7) |
| O(4)-C(7)-C(8)-O(5)    | 68.2(6)   |
| C(6)-C(7)-C(8)-O(5)    | -168.6(5) |
| O(4)-C(7)-C(8)-C(9)    | -58.1(6)  |
| C(6)-C(7)-C(8)-C(9)    | 65.1(7)   |
| C(1)-O(1)-C(9)-C(10)   | -124.5(5) |
| C(1)-O(1)-C(9)-C(8)    | 112.5(5)  |
| O(5)-C(8)-C(9)-O(1)    | 168.2(4)  |
| C(7)-C(8)-C(9)-O(1)    | -65.0(6)  |
| O(5)-C(8)-C(9)-C(10)   | 50.1(7)   |
| C(7)-C(8)-C(9)-C(10)   | 176.8(5)  |
| O(1)-C(9)-C(10)-C(11)  | 63.8(7)   |
| C(8)-C(9)-C(10)-C(11)  | -178.5(5) |
| C(9)-C(10)-C(11)-C(12) | 178.1(6)  |

---

4 Aug 2009

| Acquisition Time (sec) | 3.9846 | Date         | 04/05/2009 17:41:22 | Frequency (MHz)  | 400.13  | Nucleus              | 1H    |
|------------------------|--------|--------------|---------------------|------------------|---------|----------------------|-------|
| Original Points Count  | 32768  | Points Count | 32768               | Sweep Width (Hz) | 8223.68 | Temperature (grad C) | 0.000 |

Chloroform-d

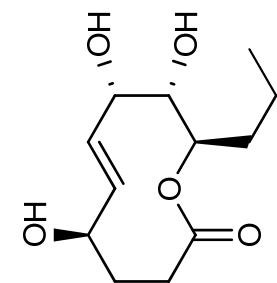

Stagonolide B (2)

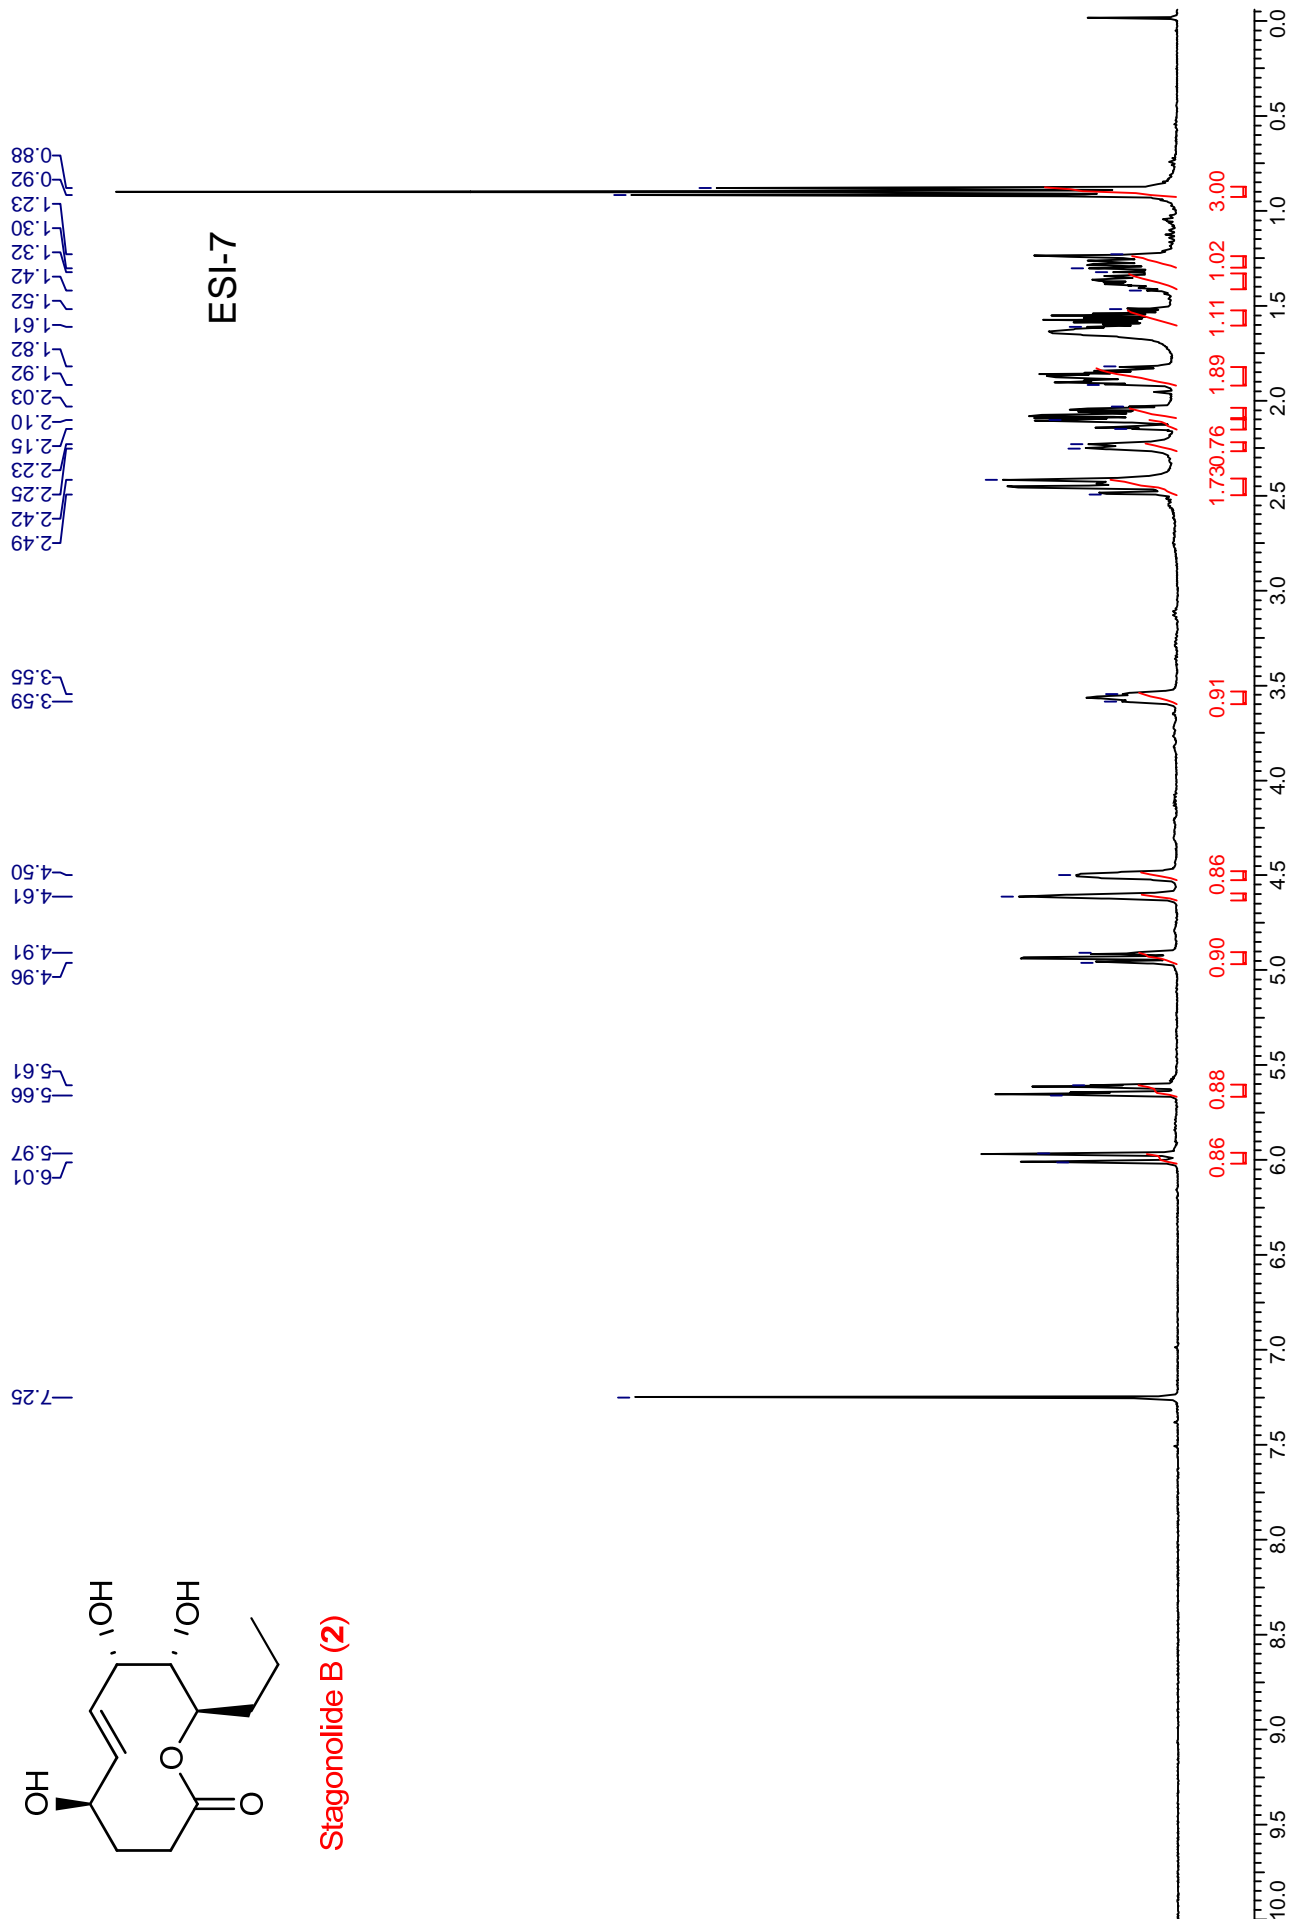

4 Aug 2009

|                        |        |              |                     |                  |          |                      |                 |
|------------------------|--------|--------------|---------------------|------------------|----------|----------------------|-----------------|
| Acquisition Time (sec) | 1.3631 | Date         | 22/04/2009 12:15:12 | Frequency (MHz)  | 100.61   | Nucleus              | <sup>13</sup> C |
| Original Points Count  | 32768  | Points Count | 32768               | Sweep Width (Hz) | 24038.46 | Temperature (grad C) | 0.000           |

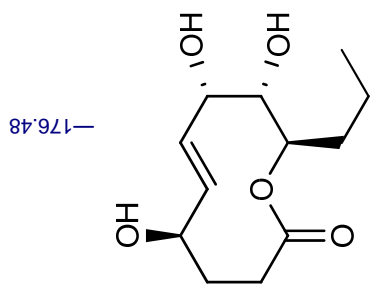

Stagonolide B (2)

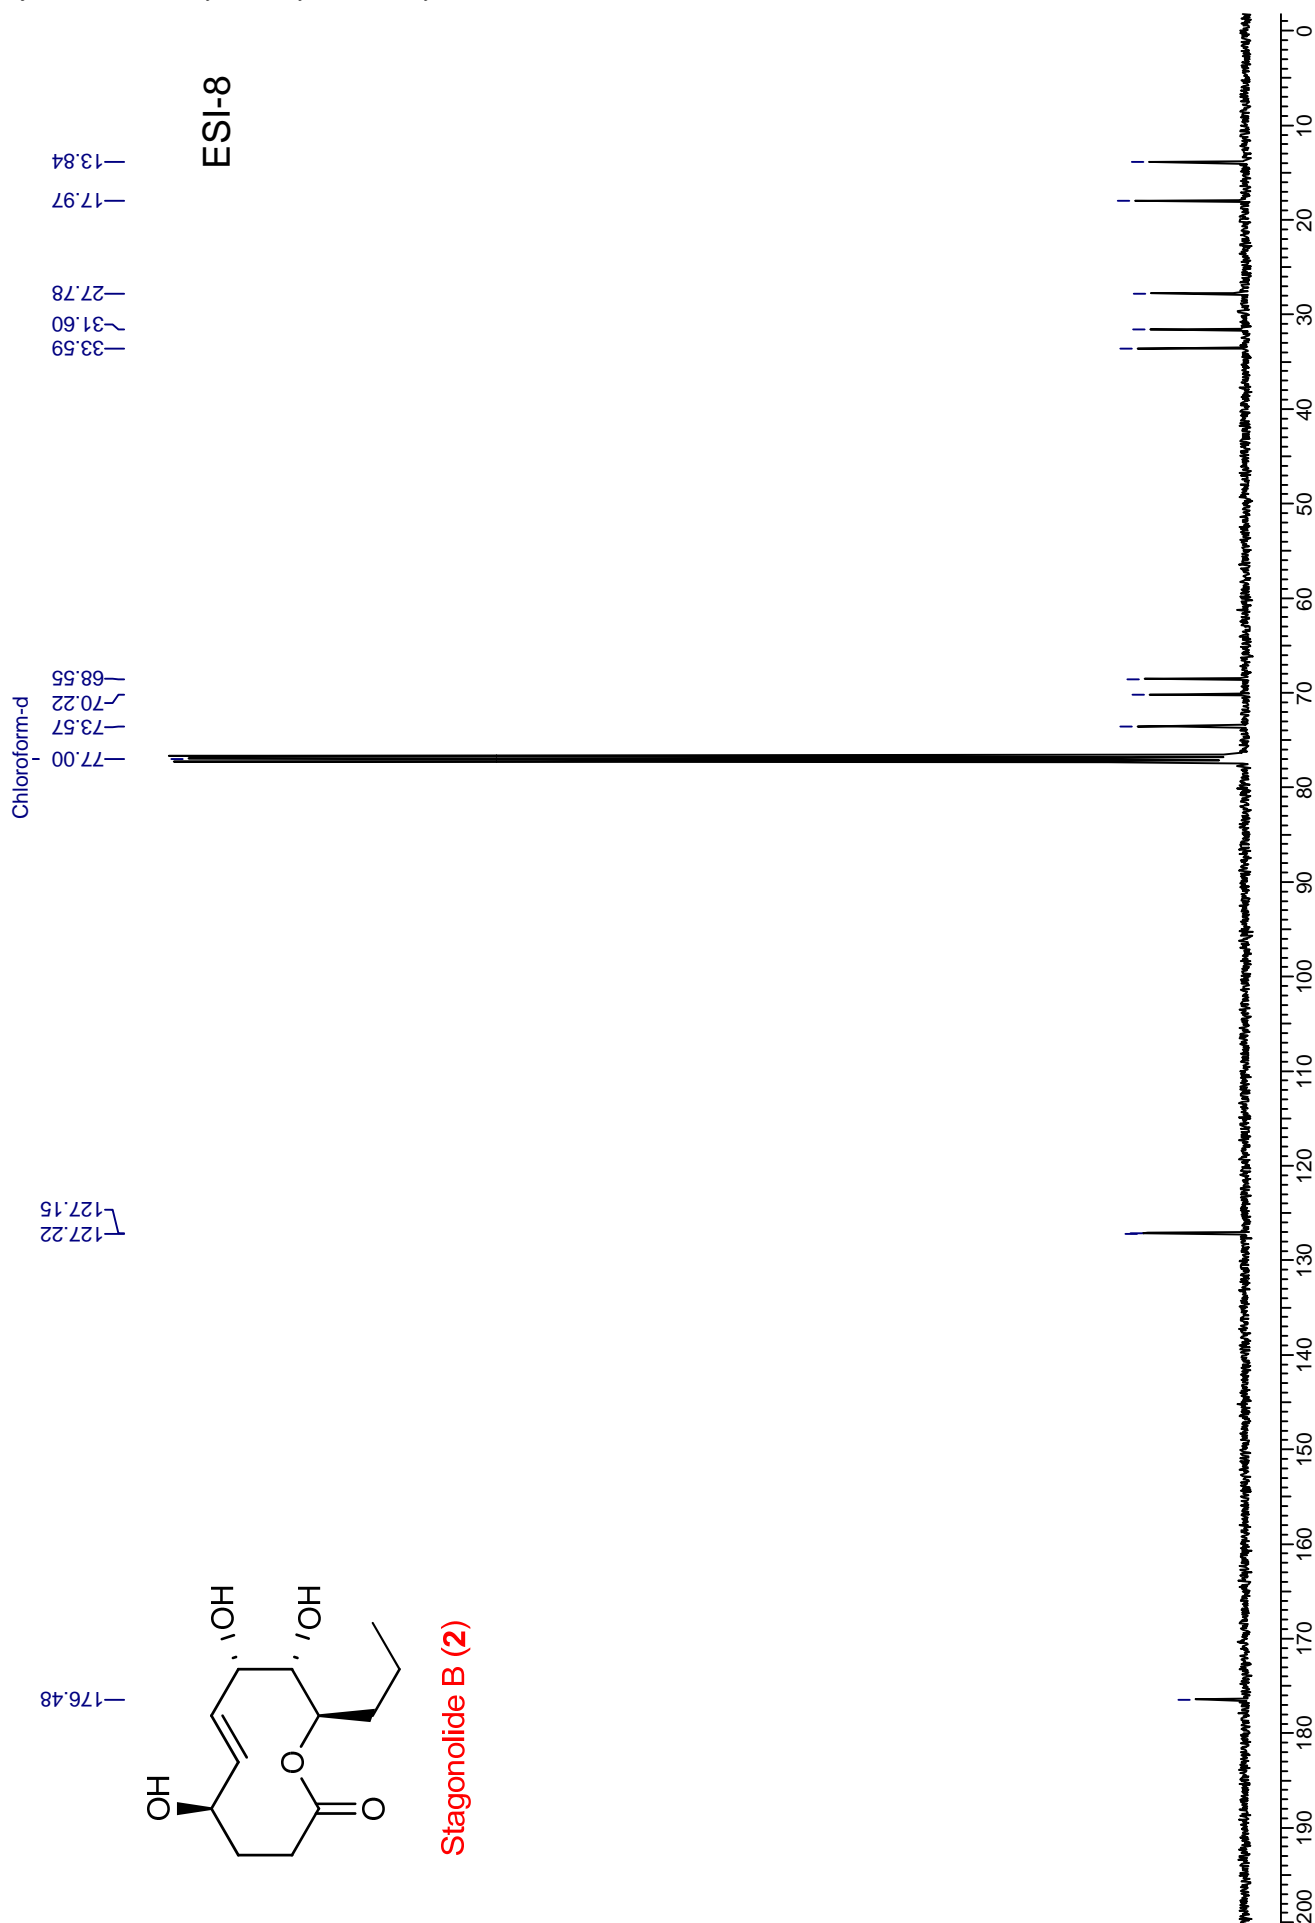



4 Aug 2009

| Acquisition Time (sec) | 1.3631 | Date         | 22/04/2009 11:41:52 | Frequency (MHz)  | 100.61   | Nucleus              | <sup>13</sup> C |
|------------------------|--------|--------------|---------------------|------------------|----------|----------------------|-----------------|
| Original Points Count  | 32768  | Points Count | 32768               | Sweep Width (Hz) | 24038.46 | Temperature (grad C) | 0.000           |

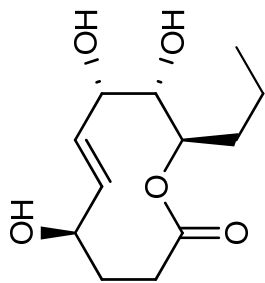

Stagonolide B (2)

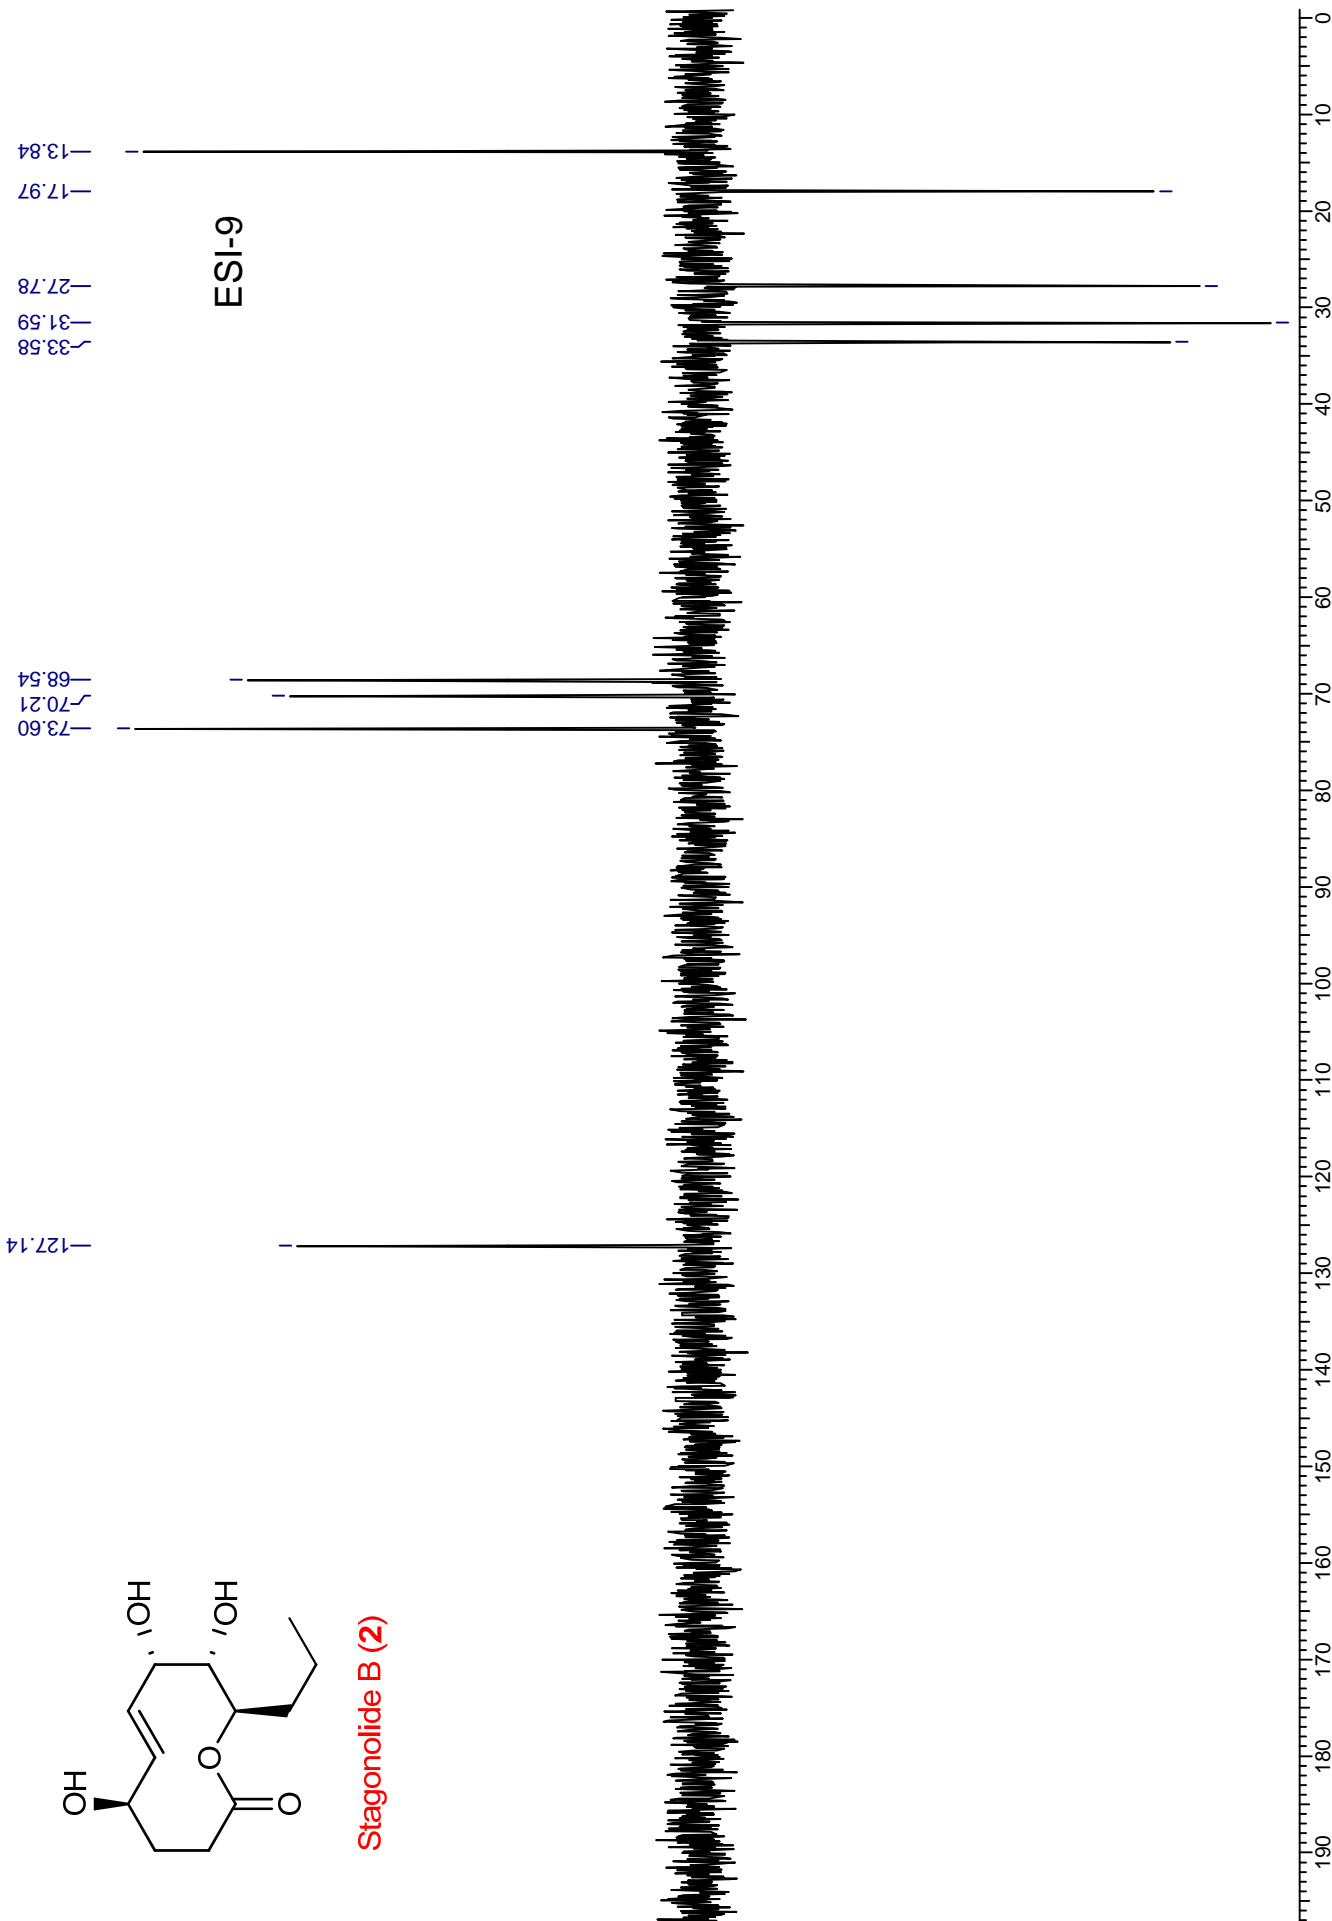

fdfsda  
 M A MONDAL

| Acquisition Time (sec) | Comment                      | Date                      | Frequency (MHz)             |
|------------------------|------------------------------|---------------------------|-----------------------------|
| 3.6351                 | M A MONDAL                   | 31/05/2008 03:06:46       | 500.13                      |
| 1H                     | Original Points Count: 32768 | Sweep Width (Hz): 9014.42 | Temperature (grad C): 0.000 |
|                        | Points Count: 32768          |                           |                             |

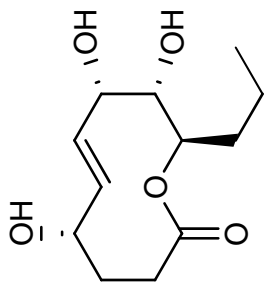

4-epi-Stagonolide B (*epi-2*)

ESI-10

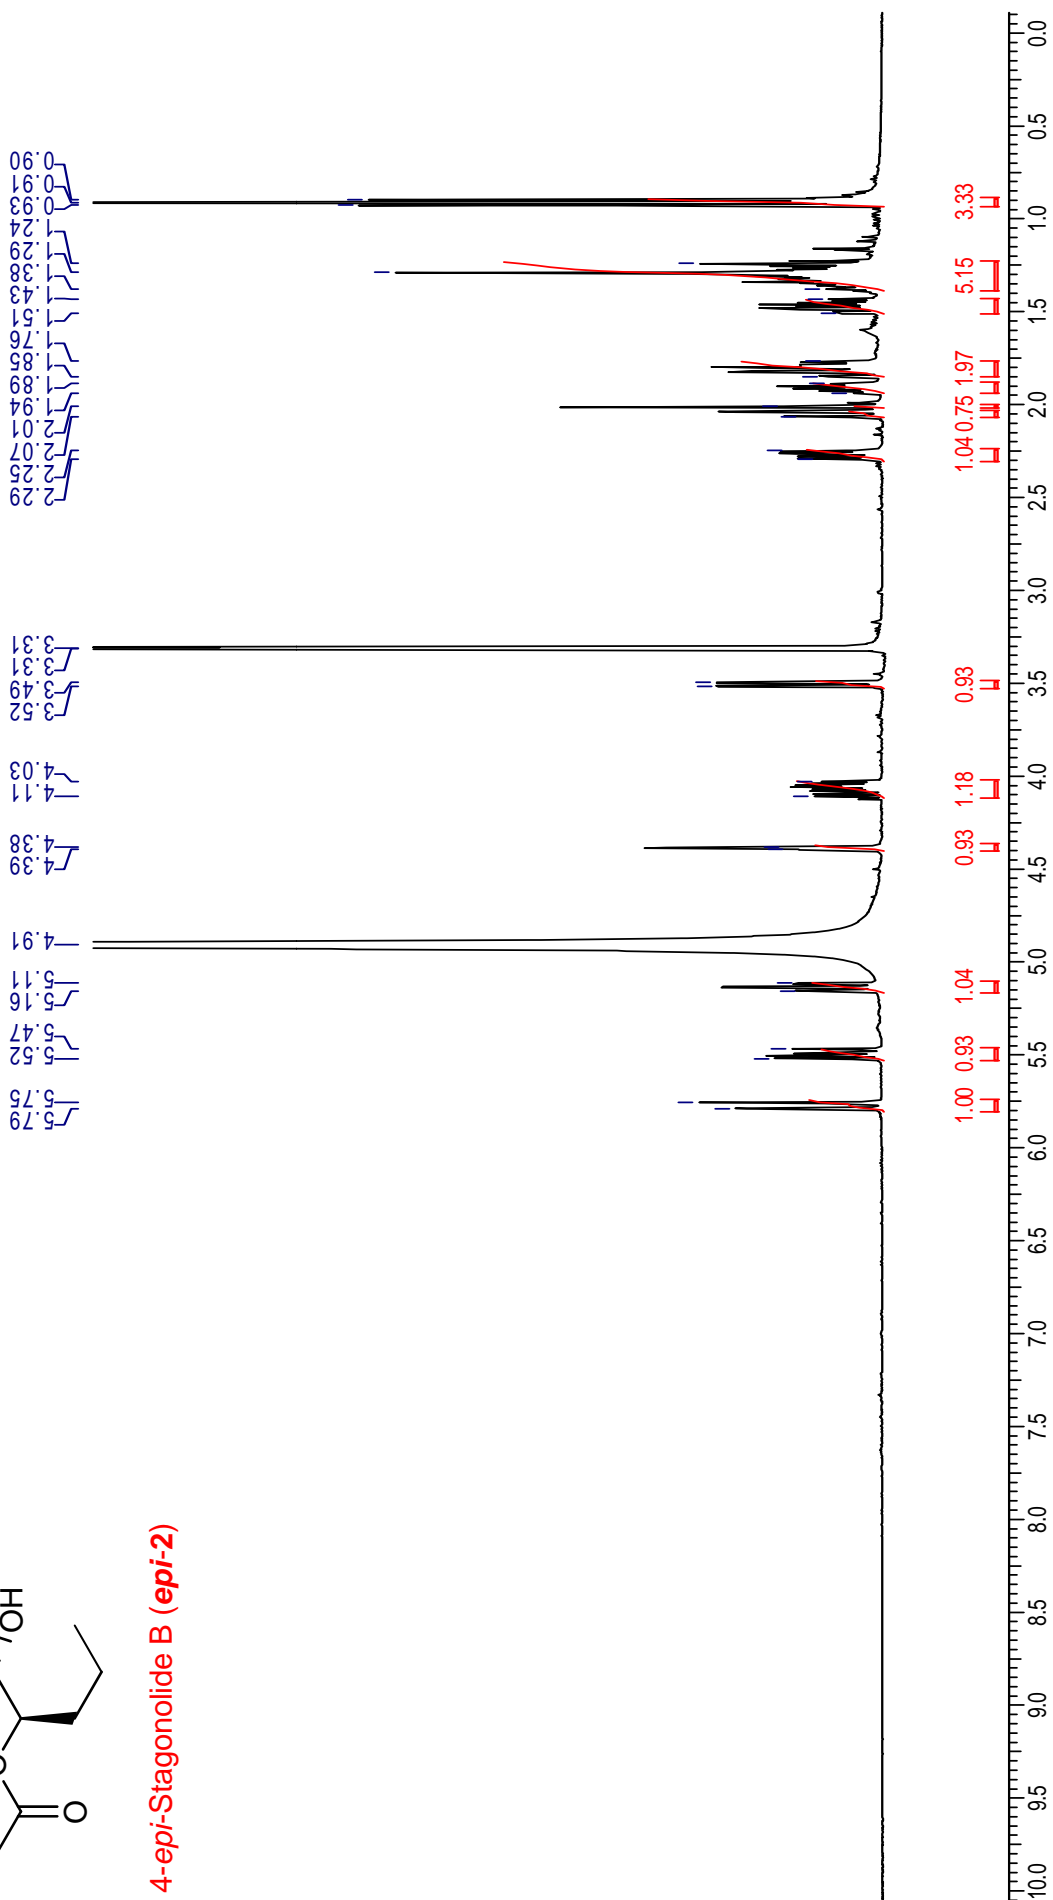

|                        |        |                  |                     |                      |        |         |                 |                       |       |
|------------------------|--------|------------------|---------------------|----------------------|--------|---------|-----------------|-----------------------|-------|
| Acquisition Time (sec) | 1.0486 | Date             | 27/05/2008 14:07:16 | Frequency (MHz)      | 125.76 | Nucleus | <sup>13</sup> C | Original Points Count | 32768 |
| Points Count           | 32768  | Sweep Width (Hz) | 31250.00            | Temperature (grad C) | 0.000  |         |                 |                       |       |

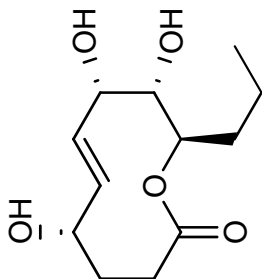

**4-epi-Stagonolide B (epi-2)**

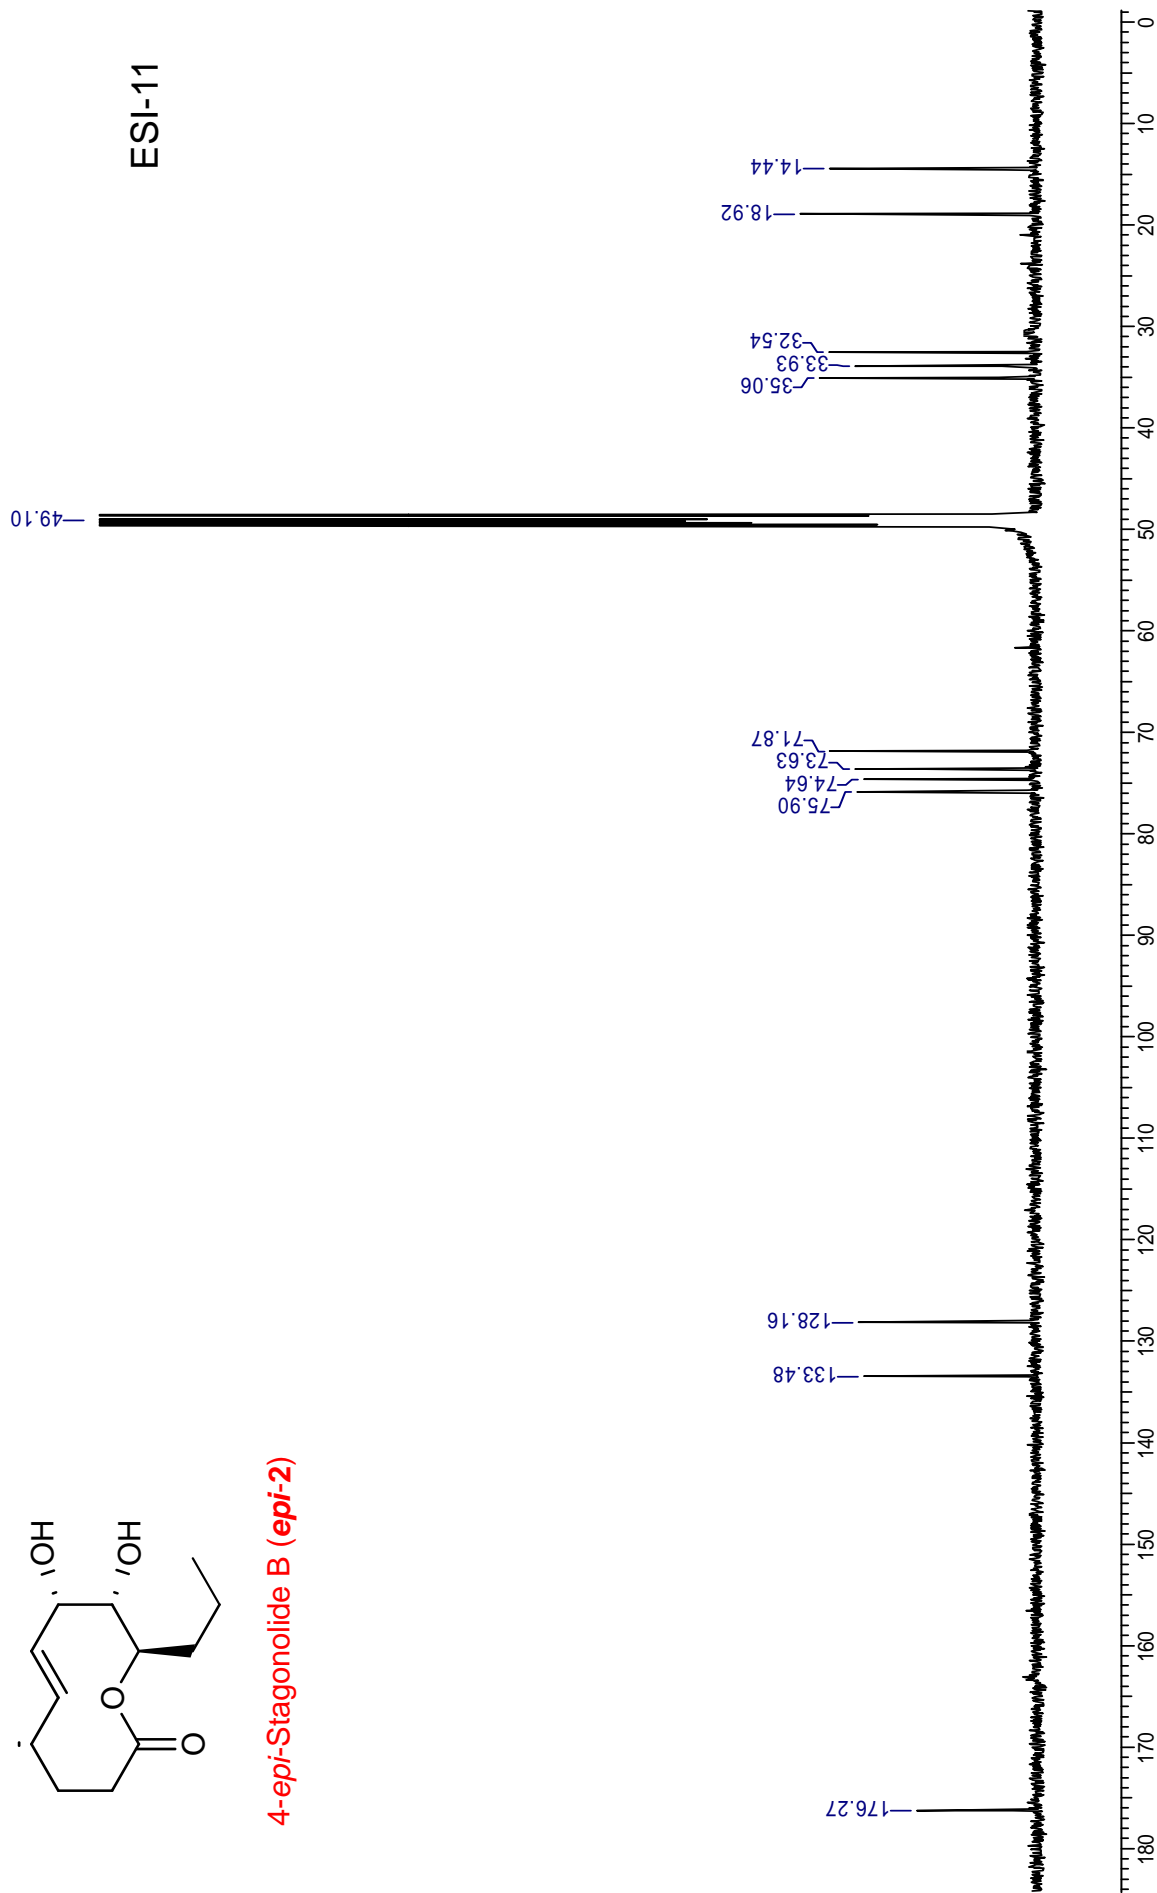

4 Aug 2009

|                        |        |              |                     |                  |          |                      |                 |
|------------------------|--------|--------------|---------------------|------------------|----------|----------------------|-----------------|
| Acquisition Time (sec) | 1.1010 | Date         | 27/05/2008 13:19:02 | Frequency (MHz)  | 125.76   | Nucleus              | <sup>13</sup> C |
| Original Points Count  | 32768  | Points Count | 32768               | Sweep Width (Hz) | 29761.90 | Temperature (grad C) | 0.000           |

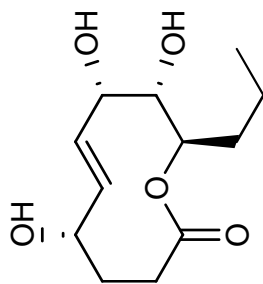

4-*epi*-Stagonolide B (*epi*-2)

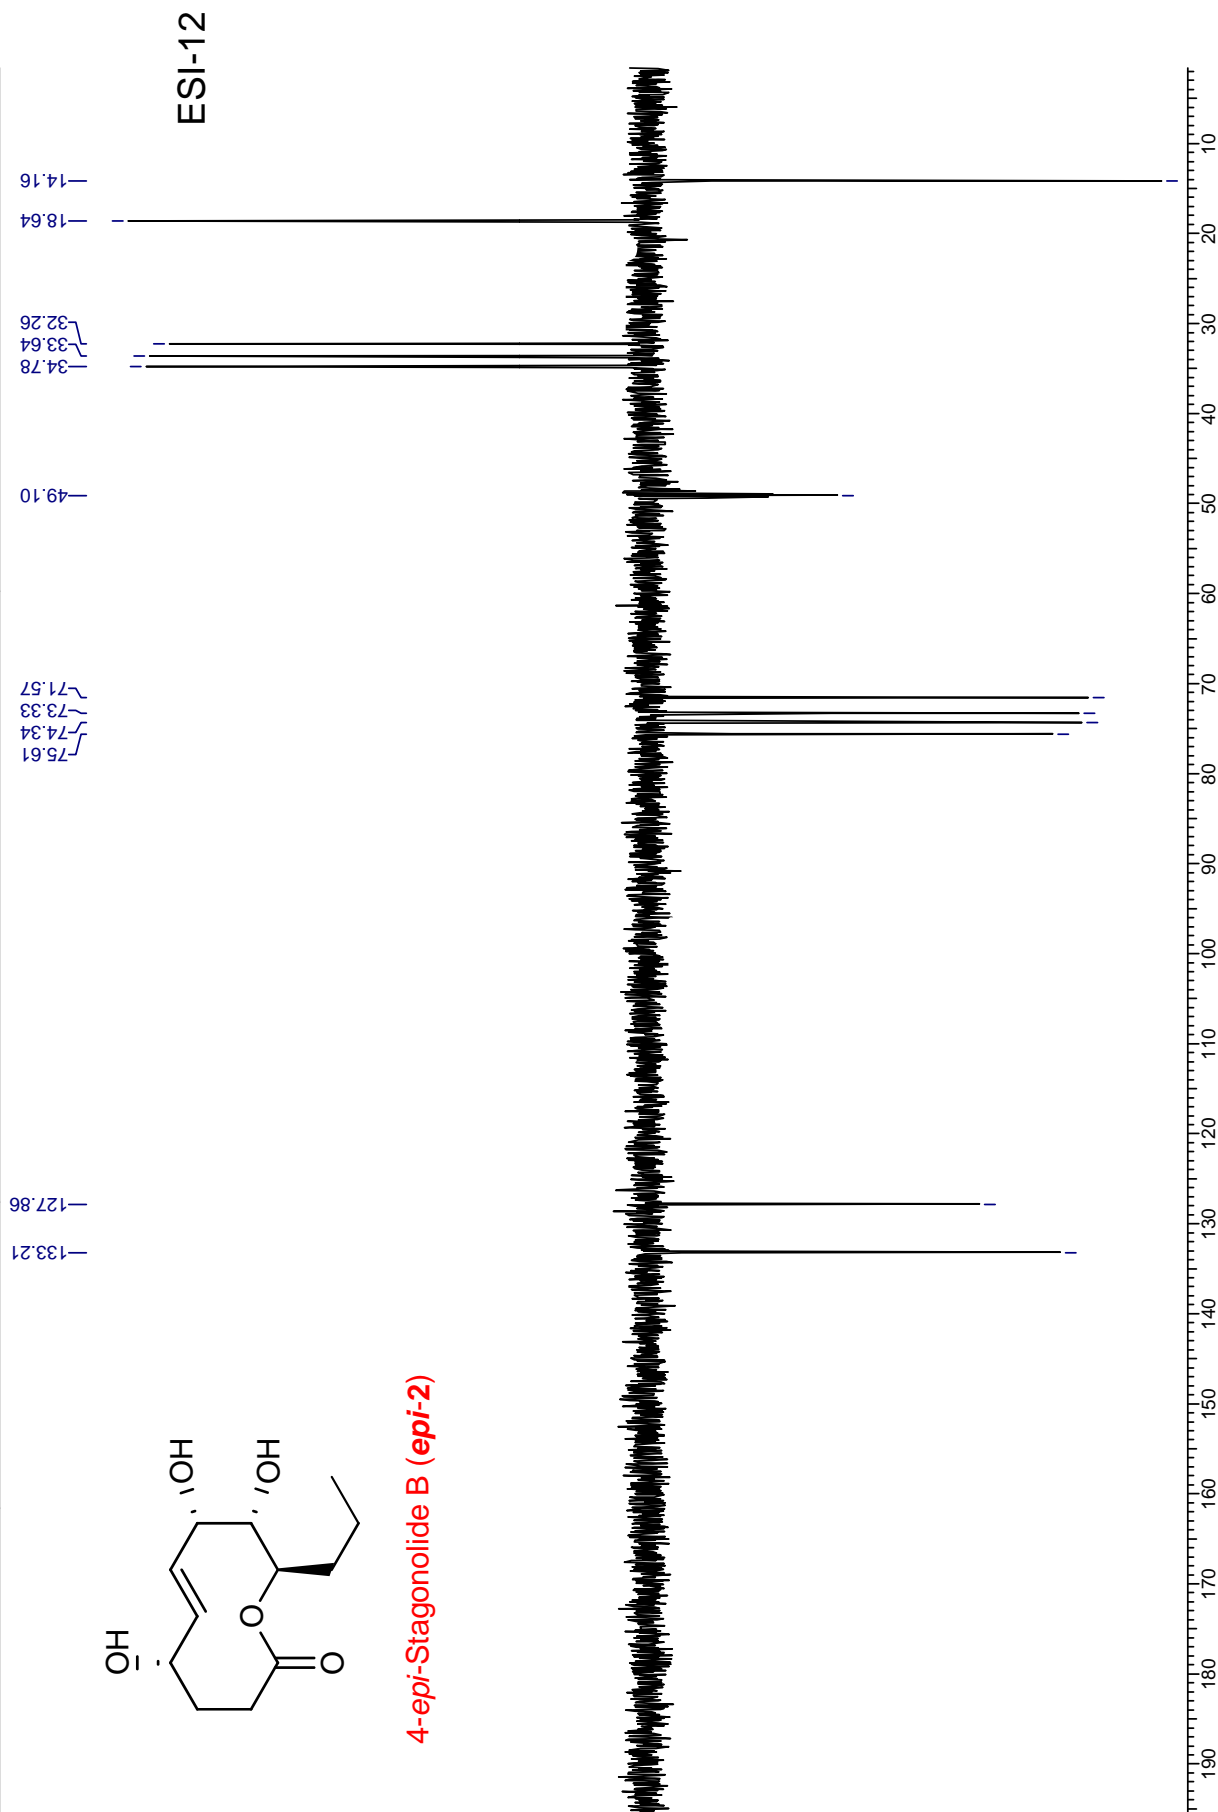

# Determination of the absolute stereochemistry of alcohol (*R*)-10

ESI-12

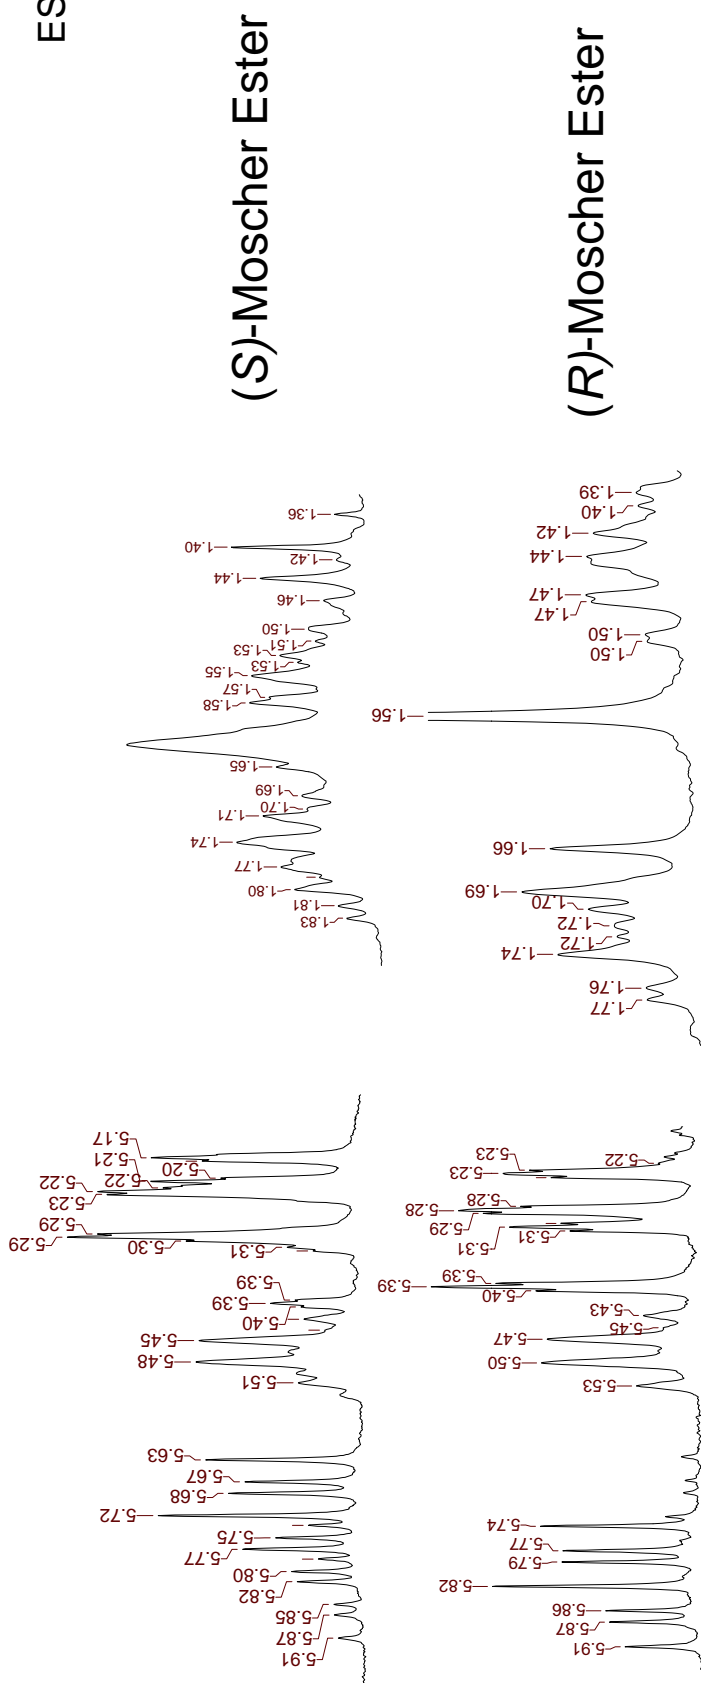

(*S*)-Moscher Ester

(*R*)-Moscher Ester

|                                                   | 1    | 2    | 3    | 4    | 5    |
|---------------------------------------------------|------|------|------|------|------|
| ( <i>S</i> )-MTPA                                 | 5.23 | 5.72 | 1.76 | 1.49 | 3.57 |
| ( <i>R</i> )-MTPA                                 | 5.31 | 5.82 | 1.71 | 1.41 | 3.54 |
| $\Delta\delta = (S\delta - \delta R) \times 1000$ | -80  | -100 | +50  | +80  | +30  |

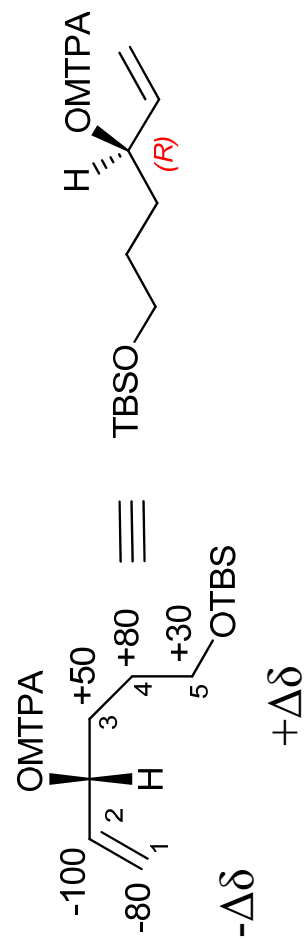

Supplement: b916198h.pdf [file b916198h.pdf]
